# Supplementary material
Source: Springer Nature journal article supplement (https://www.springermedizin.de/resource/supplementary/13058_2012_3263_MOESM2_ESM.pdf/9703684)

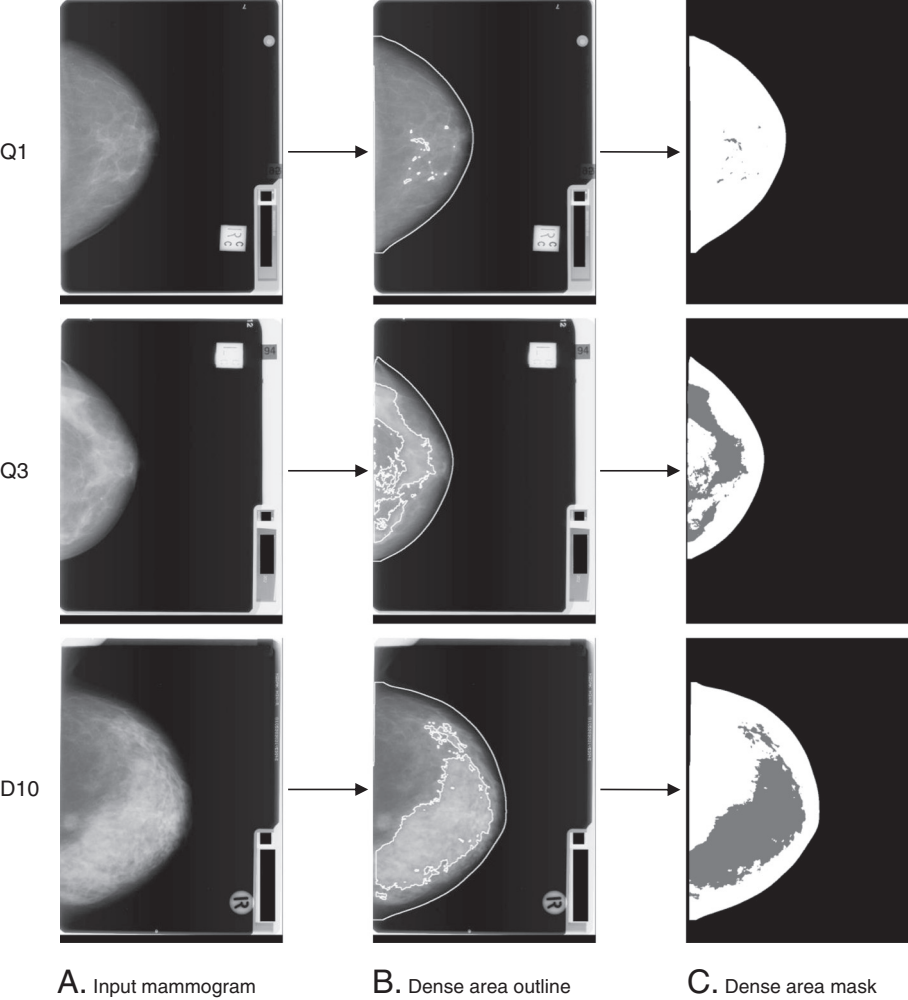

Supplement: MOESM2 [file 9703684]
